# Supplementary material for: Giant Cell Myocarditis: Not Always a Presentation of Cardiogenic Shock
Source: Case Rep Cardiol. 2015 Jul 16;2015:173826. doi: 10.1155/2015/173826 (PMC4519529; doi:10.1155/2015/173826)
Supplement: Supplementary file 1 — Movie 1: Transthoracic echocardiogram (TTE) in the apical four chamber view from hospital day 1 shows normal ventricular function, normal ventricular size, and normal ventricular wall thickness. Movie 2: Repeat transthoracic echocardiogram (TTE) in the apical four chamber view from hospital day 7 shows a dramatic decline in left ventricular systolic function with a severely depressed EF 25%, thickened ventricular walls consistent with edema, and dilation and hypokinesis of the right ventricle. Spontaneous echocontrast or "smoke" can be seen in the left ventricle due to low flow and stasis. [file 173826.f1.zip]

Archive with 2 entries (2 files):
- Movie 1.TTE_HD#1.avi
- Movie 2.TTE_HD#7.avi
